# Supplementary material for: Insights into Modifiable Risk Factors of Infertility: A Mendelian Randomization Study
Source: Nutrients. 2022 Sep 28;14(19):4042. doi: 10.3390/nu14194042 (PMC9572512; doi:10.3390/nu14194042)
Supplement: Supplementary file 1 [file nutrients-14-04042-s001.zip › supplementary materials.xlsx]

## Sheet: BMI FINALLY
Exposure	outcome	method	nsnp	b	se	pval	lo_ci	up_ci	or	or_lci95	or_uci95
Body mass index	Female infertility || id:finn-b-N14_FEMALEINFERT	MR Egger	35	-0.122789	0.0602949	0.0497914	-0.240967	-0.00461152	0.88445	0.785867	0.995399
	Female infertility || id:finn-b-N14_FEMALEINFERT	Weighted median	35	-0.0500977	0.031738	0.114456	-0.112304	0.0121087	0.951137	0.893772	1.01218
	Female infertility || id:finn-b-N14_FEMALEINFERT	Inverse variance weighted	35	-0.0178073	0.0220737	0.419827	-0.0610716	0.0254571	0.98235	0.940756	1.02578
	Female infertility || id:finn-b-N14_FEMALEINFERT	Simple mode	35	-0.0553253	0.0559895	0.330066	-0.165065	0.0544142	0.946177	0.847839	1.05592
	Female infertility || id:finn-b-N14_FEMALEINFERT	Weighted mode	35	-0.060715	0.0381767	0.121008	-0.135541	0.0141113	0.941091	0.873243	1.01421
	Male infertility || id:finn-b-N14_MALEINFERT	MR Egger	35	0.182731	0.176335	0.30761	-0.162886	0.528348	1.20049	0.849688	1.69613
	Male infertility || id:finn-b-N14_MALEINFERT	Weighted median	35	0.153715	0.0923646	0.0960689	-0.0273198	0.33475	1.16616	0.97305	1.39759
	Male infertility || id:finn-b-N14_MALEINFERT	Inverse variance weighted	35	0.21256	0.0646158	0.00100328	0.0859134	0.339207	1.23684	1.08971	1.40383
	Male infertility || id:finn-b-N14_MALEINFERT	Simple mode	35	0.212329	0.171389	0.223879	-0.123594	0.548252	1.23655	0.883738	1.73023
	Male infertility || id:finn-b-N14_MALEINFERT	Weighted mode	35	0.146736	0.117124	0.218817	-0.0828269	0.376299	1.15805	0.920511	1.45688
Whole body fat-free mass	Female infertility || id:finn-b-N14_FEMALEINFERT	MR Egger	499	0.119503	0.17812	0.502588	-0.229612	0.468618	1.12694	0.794842	1.59779
	Female infertility || id:finn-b-N14_FEMALEINFERT	Weighted median	499	-0.0512026	0.121933	0.674541	-0.290191	0.187786	0.950086	0.748121	1.20658
	Female infertility || id:finn-b-N14_FEMALEINFERT	Inverse variance weighted	499	0.0811468	0.0760281	0.285825	-0.0678683	0.230162	1.08453	0.934384	1.2588
	Female infertility || id:finn-b-N14_FEMALEINFERT	Simple mode	499	-0.42106	0.383244	0.272442	-1.17222	0.330098	0.656351	0.309679	1.39111
	Female infertility || id:finn-b-N14_FEMALEINFERT	Weighted mode	499	-0.42106	0.26415	0.111566	-0.938794	0.0966735	0.656351	0.391099	1.1015
	Male infertility || id:finn-b-N14_MALEINFERT	MR Egger	499	0.854848	0.505244	0.091282	-0.13543	1.84513	2.35102	0.87334	6.3289
	Male infertility || id:finn-b-N14_MALEINFERT	Weighted median	499	0.614951	0.37011	0.0966053	-0.110463	1.34037	1.84957	0.895419	3.82044
	Male infertility || id:finn-b-N14_MALEINFERT	Inverse variance weighted	499	0.5481	0.216153	0.0112221	0.124441	0.97176	1.72996	1.13251	2.64259
	Male infertility || id:finn-b-N14_MALEINFERT	Simple mode	499	0.962415	0.993643	0.333229	-0.985125	2.90996	2.61801	0.373393	18.356
	Male infertility || id:finn-b-N14_MALEINFERT	Weighted mode	499	0.670282	0.653072	0.305224	-0.609739	1.9503	1.95479	0.543493	7.03082
Waist-to-hip ratio	Female infertility || id:finn-b-N14_FEMALEINFERT	MR Egger	22	0.0887285	0.746858	0.906617	-1.37511	1.55257	1.09278	0.252811	4.7236
	Female infertility || id:finn-b-N14_FEMALEINFERT	Weighted median	22	0.135245	0.181219	0.455481	-0.219944	0.490433	1.14482	0.802564	1.63302
	Female infertility || id:finn-b-N14_FEMALEINFERT	Inverse variance weighted	22	0.121088	0.143843	0.399895	-0.160844	0.403021	1.12872	0.851425	1.49634
	Female infertility || id:finn-b-N14_FEMALEINFERT	Simple mode	22	0.164149	0.308675	0.600454	-0.440853	0.769152	1.17839	0.643487	2.15793
	Female infertility || id:finn-b-N14_FEMALEINFERT	Weighted mode	22	0.133479	0.27434	0.63162	-0.404228	0.671185	1.1428	0.667492	1.95655
	Male infertility || id:finn-b-N14_MALEINFERT	MR Egger	22	0.405916	1.95236	0.837401	-3.42071	4.23254	1.50068	0.0326892	68.8922
	Male infertility || id:finn-b-N14_MALEINFERT	Weighted median	22	0.249984	0.532519	0.638757	-0.793753	1.29372	1.284	0.452145	3.64633
	Male infertility || id:finn-b-N14_MALEINFERT	Inverse variance weighted	22	0.268068	0.375647	0.475464	-0.4682	1.00434	1.30744	0.626128	2.73009
	Male infertility || id:finn-b-N14_MALEINFERT	Simple mode	22	0.704171	1.0848	0.523292	-1.42203	2.83037	2.02217	0.241224	16.9517
	Male infertility || id:finn-b-N14_MALEINFERT	Weighted mode	22	0.371891	0.97104	0.705582	-1.53135	2.27513	1.45047	0.216244	9.72919
Waist-to-hip ratio adjust BMI	Female infertility || id:finn-b-N14_FEMALEINFERT	MR Egger	36	-0.572374	0.717153	0.43034	-1.97799	0.833246	0.564184	0.138346	2.30078
	Female infertility || id:finn-b-N14_FEMALEINFERT	Weighted median	36	-0.0904755	0.186851	0.628235	-0.456703	0.275752	0.913497	0.633368	1.31752
	Female infertility || id:finn-b-N14_FEMALEINFERT	Inverse variance weighted	36	0.174635	0.150857	0.247021	-0.121046	0.470316	1.19081	0.885994	1.6005
	Female infertility || id:finn-b-N14_FEMALEINFERT	Simple mode	36	-0.328529	0.386007	0.400502	-1.0851	0.428046	0.719982	0.337867	1.53426
	Female infertility || id:finn-b-N14_FEMALEINFERT	Weighted mode	36	-0.254543	0.294761	0.393709	-0.832274	0.323187	0.77527	0.435059	1.38152
	Male infertility || id:finn-b-N14_MALEINFERT	MR Egger	36	1.35971	1.72245	0.435347	-2.01629	4.73571	3.89505	0.133148	113.944
	Male infertility || id:finn-b-N14_MALEINFERT	Weighted median	36	0.535542	0.53233	0.314399	-0.507824	1.57891	1.70837	0.601803	4.84966
	Male infertility || id:finn-b-N14_MALEINFERT	Inverse variance weighted	36	-0.16963	0.361507	0.638905	-0.878185	0.538924	0.843977	0.415537	1.71416
	Male infertility || id:finn-b-N14_MALEINFERT	Simple mode	36	1.13581	1.12854	0.321111	-1.07613	3.34776	3.11371	0.340911	28.439
	Male infertility || id:finn-b-N14_MALEINFERT	Weighted mode	36	1.10443	0.981833	0.268301	-0.819962	3.02882	3.01751	0.440448	20.6729
Education	Female infertility || id:finn-b-N14_FEMALEINFERT	MR Egger	298	-0.541789	0.367252	0.141208	-1.2616	0.178025	0.581707	0.2832	1.19486
	Female infertility || id:finn-b-N14_FEMALEINFERT	Weighted median	298	-0.333037	0.139709	0.0171355	-0.606868	-0.059207	0.716743	0.545055	0.942512
	Female infertility || id:finn-b-N14_FEMALEINFERT	Inverse variance weighted	298	-0.267727	0.0938059	0.00431649	-0.451587	-0.0838677	0.765116	0.636617	0.919553
	Female infertility || id:finn-b-N14_FEMALEINFERT	Simple mode	298	-0.713234	0.494883	0.150577	-1.6832	0.256736	0.490057	0.185778	1.2927
	Female infertility || id:finn-b-N14_FEMALEINFERT	Weighted mode	298	-0.935155	0.459919	0.0429108	-1.8366	-0.0337136	0.392525	0.159359	0.966848
	Male infertility || id:finn-b-N14_MALEINFERT	MR Egger	298	0.202234	1.0689	0.850067	-1.89281	2.29728	1.22413	0.150648	9.9471
	Male infertility || id:finn-b-N14_MALEINFERT	Weighted median	298	-0.0381917	0.3934	0.922662	-0.809256	0.732873	0.962528	0.445189	2.08105
	Male infertility || id:finn-b-N14_MALEINFERT	Inverse variance weighted	298	-0.243078	0.272516	0.372407	-0.77721	0.291055	0.784211	0.459687	1.33784
	Male infertility || id:finn-b-N14_MALEINFERT	Simple mode	298	-0.429157	1.39008	0.757745	-3.15372	2.2954	0.651058	0.0426932	9.92843
	Male infertility || id:finn-b-N14_MALEINFERT	Weighted mode	298	-0.157683	1.14625	0.890678	-2.40434	2.08897	0.854121	0.0903254	8.07661
smoking	Female infertility || id:finn-b-N14_FEMALEINFERT	MR Egger	84	-0.281893	0.501174	0.575333	-1.26419	0.700407	0.754354	0.282467	2.01457
	Female infertility || id:finn-b-N14_FEMALEINFERT	Weighted median	84	0.0519579	0.135962	0.70235	-0.214528	0.318444	1.05333	0.806922	1.37499
	Female infertility || id:finn-b-N14_FEMALEINFERT	Inverse variance weighted	84	0.0908218	0.0992548	0.360172	-0.103718	0.285361	1.09507	0.90148	1.33024
	Female infertility || id:finn-b-N14_FEMALEINFERT	Simple mode	84	0.0531216	0.33175	0.873171	-0.597108	0.703351	1.05456	0.550401	2.02051
	Female infertility || id:finn-b-N14_FEMALEINFERT	Weighted mode	84	0.024768	0.310554	0.936625	-0.583917	0.633453	1.02508	0.557709	1.88411
	Male infertility || id:finn-b-N14_MALEINFERT	MR Egger	84	1.6692	1.31916	0.209329	-0.916351	4.25474	5.3079	0.399976	70.4388
	Male infertility || id:finn-b-N14_MALEINFERT	Weighted median	84	-0.15089	0.385087	0.69518	-0.90566	0.603879	0.859942	0.404275	1.8292
	Male infertility || id:finn-b-N14_MALEINFERT	Inverse variance weighted	84	-0.145671	0.263472	0.58034	-0.662076	0.370735	0.864442	0.515779	1.4488
	Male infertility || id:finn-b-N14_MALEINFERT	Simple mode	84	-0.939484	1.05145	0.374168	-3.00034	1.12137	0.390829	0.0497704	3.06905
	Male infertility || id:finn-b-N14_MALEINFERT	Weighted mode	84	-0.474436	0.866706	0.585572	-2.17318	1.22431	0.622236	0.113815	3.40181
Alcohol consumption	Female infertility || id:finn-b-N14_FEMALEINFERT	MR Egger	56	0.120107	0.931172	0.897849	-1.70499	1.9452	1.12762	0.181774	6.99505
	Female infertility || id:finn-b-N14_FEMALEINFERT	Weighted median	56	-0.126318	0.430317	0.769104	-0.969739	0.717103	0.881334	0.379182	2.04849
	Female infertility || id:finn-b-N14_FEMALEINFERT	Inverse variance weighted	56	-0.221809	0.301906	0.462524	-0.813545	0.369926	0.801068	0.443284	1.44763
	Female infertility || id:finn-b-N14_FEMALEINFERT	Simple mode	56	0.093111	1.17921	0.937351	-2.21815	2.40437	1.09758	0.10881	11.0715
	Female infertility || id:finn-b-N14_FEMALEINFERT	Weighted mode	56	0.0398638	1.05772	0.970073	-2.03327	2.113	1.04067	0.130907	8.27301
	Male infertility || id:finn-b-N14_MALEINFERT	MR Egger	56	1.33028	2.76841	0.632798	-4.0958	6.75636	3.78209	0.0166424	859.506
	Male infertility || id:finn-b-N14_MALEINFERT	Weighted median	56	1.39936	1.2703	0.270636	-1.09043	3.88915	4.05262	0.336073	48.8694
	Male infertility || id:finn-b-N14_MALEINFERT	Inverse variance weighted	56	1.8832	0.869487	0.0303207	0.179006	3.5874	6.57452	1.19603	36.1398
	Male infertility || id:finn-b-N14_MALEINFERT	Simple mode	56	5.75201	2.77919	0.0431932	0.304796	11.1992	314.822	1.35635	73073.4
	Male infertility || id:finn-b-N14_MALEINFERT	Weighted mode	56	5.97059	2.66429	0.0290851	0.748586	11.1926	391.735	2.11401	72590.2
Coffee consumed	Female infertility || id:finn-b-N14_FEMALEINFERT	MR Egger	3	-7.27508	4.77007	0.369464	-16.6244	2.07427	0.000692587	6.02705e-08	7.95874
	Female infertility || id:finn-b-N14_FEMALEINFERT	Weighted median	3	0.0424005	0.868509	0.961063	-1.65988	1.74468	1.04331	0.190162	5.72406
	Female infertility || id:finn-b-N14_FEMALEINFERT	Inverse variance weighted	3	-0.56269	0.694725	0.417971	-1.92435	0.798971	0.569675	0.145971	2.22325
	Female infertility || id:finn-b-N14_FEMALEINFERT	Simple mode	3	0.0469772	0.950631	0.965078	-1.81626	1.91021	1.0481	0.162633	6.75453
	Female infertility || id:finn-b-N14_FEMALEINFERT	Weighted mode	3	0.0469772	0.956628	0.965297	-1.82801	1.92197	1.0481	0.160733	6.8344
	Male infertility || id:finn-b-N14_MALEINFERT	MR Egger	3	-7.88474	14.1015	0.675429	-35.5237	19.7542	0.000376444	3.73475e-16	3.79436e+08
	Male infertility || id:finn-b-N14_MALEINFERT	Weighted median	3	2.60439	2.29154	0.255739	-1.88704	7.09581	13.5229	0.15152	1206.91
	Male infertility || id:finn-b-N14_MALEINFERT	Inverse variance weighted	3	2.08897	1.98938	0.293688	-1.8102	5.98815	8.07662	0.163621	398.676
	Male infertility || id:finn-b-N14_MALEINFERT	Simple mode	3	2.91633	2.89224	0.419456	-2.75245	8.58512	18.4734	0.0637714	5351.43
	Male infertility || id:finn-b-N14_MALEINFERT	Weighted mode	3	3.02603	2.78061	0.390147	-2.42397	8.47602	20.6151	0.0885692	4798.33
Sleep duration	Female infertility || id:finn-b-N14_FEMALEINFERT	MR Egger	42	-1.32849	1.05739	0.216261	-3.40097	0.74398	0.264876	0.0333409	2.10429
	Female infertility || id:finn-b-N14_FEMALEINFERT	Weighted median	42	0.119931	0.377581	0.750765	-0.620127	0.85999	1.12742	0.537876	2.36314
	Female infertility || id:finn-b-N14_FEMALEINFERT	Inverse variance weighted	42	-0.00307499	0.262279	0.990646	-0.517143	0.510993	0.99693	0.596222	1.66694
	Female infertility || id:finn-b-N14_FEMALEINFERT	Simple mode	42	0.45119	0.724464	0.53687	-0.968759	1.87114	1.57018	0.379554	6.4957
	Female infertility || id:finn-b-N14_FEMALEINFERT	Weighted mode	42	0.264204	0.620497	0.672484	-0.951969	1.48038	1.30239	0.38598	4.39461
	Male infertility || id:finn-b-N14_MALEINFERT	MR Egger	42	1.3549	3.01157	0.655211	-4.54777	7.25757	3.87638	0.0105908	1418.81
	Male infertility || id:finn-b-N14_MALEINFERT	Weighted median	42	0.970762	1.06966	0.364122	-1.12578	3.0673	2.63995	0.3244	21.4839
	Male infertility || id:finn-b-N14_MALEINFERT	Inverse variance weighted	42	0.65491	0.741234	0.376944	-0.797908	2.10773	1.92497	0.45027	8.22952
	Male infertility || id:finn-b-N14_MALEINFERT	Simple mode	42	3.14559	2.47727	0.211323	-1.70986	8.00104	23.2334	0.180891	2984.06
	Male infertility || id:finn-b-N14_MALEINFERT	Weighted mode	42	2.77219	2.03919	0.181432	-1.22462	6.76899	15.9935	0.29387	870.431
Sleeplessness / insomnia	Female infertility || id:finn-b-N14_FEMALEINFERT	MR Egger	39	1.12545	1.04718	0.289448	-0.927021	3.17793	3.08161	0.395731	23.9969
	Female infertility || id:finn-b-N14_FEMALEINFERT	Weighted median	39	0.142475	0.472855	0.76318	-0.784321	1.06927	1.15312	0.45643	2.91325
	Female infertility || id:finn-b-N14_FEMALEINFERT	Inverse variance weighted	39	0.401591	0.356727	0.260265	-0.297594	1.10078	1.4942	0.742603	3.0065
	Female infertility || id:finn-b-N14_FEMALEINFERT	Simple mode	39	-0.469957	0.8616	0.588634	-2.15869	1.21878	0.625029	0.115476	3.38306
	Female infertility || id:finn-b-N14_FEMALEINFERT	Weighted mode	39	-0.165042	0.643648	0.799012	-1.42659	1.09651	0.847858	0.240126	2.99369
	Male infertility || id:finn-b-N14_MALEINFERT	MR Egger	39	-1.20009	2.93918	0.6854	-6.96088	4.56069	0.301166	0.000948261	95.6496
	Male infertility || id:finn-b-N14_MALEINFERT	Weighted median	39	-1.49672	1.38532	0.279958	-4.21196	1.21851	0.223862	0.0148173	3.38215
	Male infertility || id:finn-b-N14_MALEINFERT	Inverse variance weighted	39	-1.00505	0.990585	0.310294	-2.9466	0.936493	0.366025	0.0525179	2.55102
	Male infertility || id:finn-b-N14_MALEINFERT	Simple mode	39	-2.1686	2.349	0.361727	-6.77265	2.43544	0.114337	0.00114466	11.4208
	Male infertility || id:finn-b-N14_MALEINFERT	Weighted mode	39	-1.666	1.92871	0.393125	-5.44628	2.11428	0.189002	0.00431232	8.28365
physical activity	Female infertility || id:finn-b-N14_FEMALEINFERT	MR Egger	16	-0.965267	1.26937	0.459612	-3.45322	1.52269	0.380882	0.0316434	4.58454
	Female infertility || id:finn-b-N14_FEMALEINFERT	Weighted median	16	0.0724635	0.23867	0.761422	-0.39533	0.540257	1.07515	0.673458	1.71645
	Female infertility || id:finn-b-N14_FEMALEINFERT	Inverse variance weighted	16	0.0820182	0.192409	0.669911	-0.295104	0.45914	1.08548	0.744454	1.58271
	Female infertility || id:finn-b-N14_FEMALEINFERT	Simple mode	16	0.100265	0.48834	0.840084	-0.856882	1.05741	1.10546	0.424484	2.87891
	Female infertility || id:finn-b-N14_FEMALEINFERT	Weighted mode	16	0.0504536	0.481322	0.917905	-0.892937	0.993844	1.05175	0.409451	2.7016
	Male infertility || id:finn-b-N14_MALEINFERT	MR Egger	16	-5.46042	4.12136	0.206421	-13.5383	2.61744	0.00425179	1.31948e-06	13.7007
	Male infertility || id:finn-b-N14_MALEINFERT	Weighted median	16	-0.496982	0.677237	0.463048	-1.82437	0.830403	0.608364	0.16132	2.29424
	Male infertility || id:finn-b-N14_MALEINFERT	Inverse variance weighted	16	0.649997	0.655914	0.321696	-0.635594	1.93559	1.91553	0.529621	6.92811
	Male infertility || id:finn-b-N14_MALEINFERT	Simple mode	16	-1.02468	1.14538	0.385119	-3.26962	1.22026	0.358911	0.0380209	3.38806
	Male infertility || id:finn-b-N14_MALEINFERT	Weighted mode	16	-0.853685	1.17621	0.479136	-3.15905	1.45168	0.425843	0.042466	4.27028
Sedentary behaviour duration	Female infertility || id:finn-b-N14_FEMALEINFERT	MR Egger	4	0.0690381	1.7205	0.971638	-3.30315	3.44123	1.07148	0.0367671	31.2253
	Female infertility || id:finn-b-N14_FEMALEINFERT	Weighted median	4	-0.227499	0.418959	0.587124	-1.04866	0.593662	0.796524	0.350407	1.81061
	Female infertility || id:finn-b-N14_FEMALEINFERT	Inverse variance weighted	4	-0.288711	0.355459	0.416666	-0.98541	0.407989	0.749229	0.373286	1.50379
	Female infertility || id:finn-b-N14_FEMALEINFERT	Simple mode	4	-0.166525	0.577458	0.791835	-1.29834	0.965292	0.846601	0.272984	2.62555
	Female infertility || id:finn-b-N14_FEMALEINFERT	Weighted mode	4	-0.166525	0.589493	0.795937	-1.32193	0.988882	0.846601	0.26662	2.68823
	Male infertility || id:finn-b-N14_MALEINFERT	MR Egger	4	4.38768	5.69701	0.52173	-6.77847	15.5538	80.4537	0.00113802	5.68777e+06
	Male infertility || id:finn-b-N14_MALEINFERT	Weighted median	4	-1.23992	1.31453	0.345556	-3.81639	1.33655	0.289408	0.0220071	3.8059
	Male infertility || id:finn-b-N14_MALEINFERT	Inverse variance weighted	4	-1.77725	1.22573	0.147073	-4.17968	0.625186	0.169103	0.0153034	1.86859
	Male infertility || id:finn-b-N14_MALEINFERT	Simple mode	4	-0.287684	2.15025	0.902039	-4.50218	3.92681	0.749998	0.0110848	50.7448
	Male infertility || id:finn-b-N14_MALEINFERT	Weighted mode	4	-0.258675	2.00836	0.905666	-4.19506	3.67771	0.772074	0.0150699	39.5556
Serum 25-Hydroxyvitamin D levels	Female infertility || id:finn-b-N14_FEMALEINFERT	MR Egger	113	-0.0506859	0.124051	0.683629	-0.293827	0.192455	0.950577	0.745406	1.21222
	Female infertility || id:finn-b-N14_FEMALEINFERT	Weighted median	113	-0.066807	0.12616	0.596431	-0.314081	0.180467	0.935376	0.73046	1.19778
	Female infertility || id:finn-b-N14_FEMALEINFERT	Inverse variance weighted	113	-0.124054	0.0802002	0.12191	-0.281247	0.0331382	0.883332	0.754842	1.03369
	Female infertility || id:finn-b-N14_FEMALEINFERT	Simple mode	113	0.000715518	0.22284	0.997444	-0.436051	0.437482	1.00072	0.646585	1.5488
	Female infertility || id:finn-b-N14_FEMALEINFERT	Weighted mode	113	-0.0633396	0.111361	0.570648	-0.281608	0.154929	0.938625	0.754569	1.16757
	Male infertility || id:finn-b-N14_MALEINFERT	MR Egger	113	-0.544458	0.358821	0.132021	-1.24775	0.158832	0.580156	0.287151	1.17214
	Male infertility || id:finn-b-N14_MALEINFERT	Weighted median	113	-0.510754	0.397334	0.198635	-1.28953	0.268022	0.600043	0.2754	1.30738
	Male infertility || id:finn-b-N14_MALEINFERT	Inverse variance weighted	113	-0.377083	0.232589	0.104966	-0.832956	0.0787911	0.685859	0.434762	1.08198
	Male infertility || id:finn-b-N14_MALEINFERT	Simple mode	113	-0.408971	0.818937	0.618482	-2.01409	1.19614	0.664333	0.133442	3.30734
	Male infertility || id:finn-b-N14_MALEINFERT	Weighted mode	113	-0.559473	0.351521	0.114298	-1.24845	0.129507	0.57151	0.286948	1.13827
Zinc	Female infertility || id:finn-b-N14_FEMALEINFERT	Inverse variance weighted	2	0.0215481	0.0830227	0.795215	-0.141176	0.184273	1.02178	0.868336	1.20234
	Male infertility || id:finn-b-N14_MALEINFERT	Inverse variance weighted	2	0.105926	0.210477	0.614778	-0.306609	0.518461	1.11174	0.735938	1.67944
Omega-6 fatty acids	Female infertility || id:finn-b-N14_FEMALEINFERT	MR Egger	52	0.0824364	0.121717	0.501351	-0.156129	0.321002	1.08593	0.855449	1.37851
	Female infertility || id:finn-b-N14_FEMALEINFERT	Weighted median	52	0.137007	0.0959002	0.153108	-0.0509577	0.324971	1.14684	0.950319	1.38399
	Female infertility || id:finn-b-N14_FEMALEINFERT	Inverse variance weighted	52	0.120246	0.0602737	0.0460434	0.00210928	0.238382	1.12777	1.00211	1.26919
	Female infertility || id:finn-b-N14_FEMALEINFERT	Simple mode	52	0.313837	0.159008	0.0538438	0.00218044	0.625493	1.36867	1.00218	1.86917
	Female infertility || id:finn-b-N14_FEMALEINFERT	Weighted mode	52	0.0643734	0.10991	0.560667	-0.151051	0.279798	1.06649	0.859804	1.32286
	Male infertility || id:finn-b-N14_MALEINFERT	MR Egger	52	0.370746	0.357749	0.305034	-0.330442	1.07193	1.44882	0.718606	2.92102
	Male infertility || id:finn-b-N14_MALEINFERT	Weighted median	52	0.191724	0.261757	0.463892	-0.321319	0.704767	1.21134	0.725192	2.02338
	Male infertility || id:finn-b-N14_MALEINFERT	Inverse variance weighted	52	0.0725297	0.17686	0.681735	-0.274115	0.419175	1.07522	0.760244	1.52071
	Male infertility || id:finn-b-N14_MALEINFERT	Simple mode	52	0.358447	0.565544	0.529038	-0.750019	1.46691	1.43111	0.472358	4.33583
	Male infertility || id:finn-b-N14_MALEINFERT	Weighted mode	52	0.482791	0.419045	0.254644	-0.338538	1.30412	1.62059	0.712811	3.68444
Omega-3 fatty acids	Female infertility || id:finn-b-N14_FEMALEINFERT	MR Egger	47	-0.0451078	0.0630589	0.478102	-0.168703	0.0784877	0.955894	0.844759	1.08165
	Female infertility || id:finn-b-N14_FEMALEINFERT	Weighted median	47	-0.0551604	0.0523926	0.292421	-0.15785	0.0475292	0.946333	0.853978	1.04868
	Female infertility || id:finn-b-N14_FEMALEINFERT	Inverse variance weighted	47	0.00644851	0.0456681	0.887709	-0.083061	0.095958	1.00647	0.920295	1.10071
	Female infertility || id:finn-b-N14_FEMALEINFERT	Simple mode	47	0.00758573	0.117672	0.948879	-0.223052	0.238223	1.00761	0.800073	1.26899
	Female infertility || id:finn-b-N14_FEMALEINFERT	Weighted mode	47	-0.0387265	0.0472282	0.416453	-0.131294	0.0538409	0.962014	0.87696	1.05532
	Male infertility || id:finn-b-N14_MALEINFERT	MR Egger	47	0.252756	0.168809	0.1413	-0.0781103	0.583623	1.28757	0.924862	1.79252
	Male infertility || id:finn-b-N14_MALEINFERT	Weighted median	47	0.240405	0.155038	0.120994	-0.06347	0.544279	1.27176	0.938502	1.72337
	Male infertility || id:finn-b-N14_MALEINFERT	Inverse variance weighted	47	0.179308	0.121642	0.140465	-0.0591105	0.417726	1.19639	0.942603	1.5185
	Male infertility || id:finn-b-N14_MALEINFERT	Simple mode	47	-0.459622	0.408807	0.266719	-1.26088	0.341641	0.631523	0.283403	1.40725
	Male infertility || id:finn-b-N14_MALEINFERT	Weighted mode	47	0.25404	0.147921	0.0926323	-0.0358855	0.543965	1.28922	0.964751	1.72282
Total fatty acids	Female infertility || id:finn-b-N14_FEMALEINFERT	MR Egger	12	0.0702569	0.254132	0.787826	-0.427843	0.568356	1.07278	0.651914	1.76536
	Female infertility || id:finn-b-N14_FEMALEINFERT	Weighted median	12	0.158908	0.0799426	0.0468365	0.00222048	0.315596	1.17223	1.00222	1.37108
	Female infertility || id:finn-b-N14_FEMALEINFERT	Inverse variance weighted	12	0.146668	0.0602146	0.0148609	0.0286472	0.264688	1.15797	1.02906	1.30302
	Female infertility || id:finn-b-N14_FEMALEINFERT	Simple mode	12	0.178819	0.134726	0.211306	-0.0852439	0.442881	1.1958	0.918288	1.55719
	Female infertility || id:finn-b-N14_FEMALEINFERT	Weighted mode	12	0.189015	0.127975	0.167732	-0.0618158	0.439846	1.20806	0.940056	1.55247
	Male infertility || id:finn-b-N14_MALEINFERT	MR Egger	12	-0.240939	0.838138	0.779622	-1.88369	1.40181	0.785889	0.152028	4.06255
	Male infertility || id:finn-b-N14_MALEINFERT	Weighted median	12	0.0933859	0.241639	0.699149	-0.380226	0.566998	1.09789	0.683707	1.76297
	Male infertility || id:finn-b-N14_MALEINFERT	Inverse variance weighted	12	0.146722	0.191103	0.442626	-0.227839	0.521283	1.15803	0.796252	1.68419
	Male infertility || id:finn-b-N14_MALEINFERT	Simple mode	12	0.597461	0.467462	0.227527	-0.318765	1.51369	1.8175	0.727047	4.54345
	Male infertility || id:finn-b-N14_MALEINFERT	Weighted mode	12	-0.131126	0.338504	0.705873	-0.794594	0.532341	0.877107	0.451765	1.70291
Polyunsaturated fatty acids	Female infertility || id:finn-b-N14_FEMALEINFERT	MR Egger	56	0.0155062	0.10576	0.88398	-0.191783	0.222795	1.01563	0.825486	1.24956
	Female infertility || id:finn-b-N14_FEMALEINFERT	Weighted median	56	0.0909752	0.082235	0.268604	-0.0702055	0.252156	1.09524	0.932202	1.2868
	Female infertility || id:finn-b-N14_FEMALEINFERT	Inverse variance weighted	56	0.0711559	0.0536559	0.184789	-0.0340096	0.176321	1.07375	0.966562	1.19282
	Female infertility || id:finn-b-N14_FEMALEINFERT	Simple mode	56	0.323742	0.142828	0.0273657	0.0437983	0.603686	1.38229	1.04477	1.82885
	Female infertility || id:finn-b-N14_FEMALEINFERT	Weighted mode	56	0.0373299	0.0948718	0.695488	-0.148619	0.223279	1.03804	0.861898	1.25017
	Male infertility || id:finn-b-N14_MALEINFERT	MR Egger	56	0.489821	0.314362	0.125041	-0.126329	1.10597	1.63202	0.881325	3.02215
	Male infertility || id:finn-b-N14_MALEINFERT	Weighted median	56	0.309429	0.248898	0.213796	-0.178412	0.79727	1.36265	0.836598	2.21947
	Male infertility || id:finn-b-N14_MALEINFERT	Inverse variance weighted	56	0.0729511	0.161366	0.651208	-0.243326	0.389229	1.07568	0.784016	1.47584
	Male infertility || id:finn-b-N14_MALEINFERT	Simple mode	56	0.518949	0.473936	0.278299	-0.409965	1.44786	1.68026	0.663673	4.25402
	Male infertility || id:finn-b-N14_MALEINFERT	Weighted mode	56	0.497438	0.330834	0.138409	-0.150997	1.14587	1.6445	0.85985	3.14519
Monounsaturated fatty acids	Female infertility || id:finn-b-N14_FEMALEINFERT	MR Egger	57	0.0416271	0.0907651	0.64831	-0.136272	0.219527	1.04251	0.872605	1.24549
	Female infertility || id:finn-b-N14_FEMALEINFERT	Weighted median	57	0.0823433	0.0809265	0.308912	-0.0762727	0.240959	1.08583	0.926564	1.27247
	Female infertility || id:finn-b-N14_FEMALEINFERT	Inverse variance weighted	57	0.135384	0.0556579	0.0149976	0.0262948	0.244474	1.14498	1.02664	1.27695
	Female infertility || id:finn-b-N14_FEMALEINFERT	Simple mode	57	0.339871	0.137311	0.0163688	0.0707416	0.609001	1.40477	1.0733	1.83859
	Female infertility || id:finn-b-N14_FEMALEINFERT	Weighted mode	57	0.0649904	0.0808263	0.424754	-0.0934292	0.22341	1.06715	0.910802	1.25033
	Male infertility || id:finn-b-N14_MALEINFERT	MR Egger	57	0.164937	0.266527	0.538579	-0.357456	0.68733	1.17932	0.699453	1.9884
	Male infertility || id:finn-b-N14_MALEINFERT	Weighted median	57	0.0858196	0.278596	0.758049	-0.460228	0.631867	1.08961	0.63114	1.88112
	Male infertility || id:finn-b-N14_MALEINFERT	Inverse variance weighted	57	0.0445288	0.163394	0.785219	-0.275723	0.364781	1.04554	0.759023	1.4402
	Male infertility || id:finn-b-N14_MALEINFERT	Simple mode	57	0.537006	0.577945	0.356792	-0.595767	1.66978	1.71088	0.55114	5.31099
	Male infertility || id:finn-b-N14_MALEINFERT	Weighted mode	57	-0.218741	0.309871	0.48317	-0.826088	0.388606	0.80353	0.437759	1.47492
HDL cholesterol	Female infertility || id:finn-b-N14_FEMALEINFERT	MR Egger	310	0.0581306	0.0733681	0.428787	-0.0856709	0.201932	1.05985	0.917896	1.22376
	Female infertility || id:finn-b-N14_FEMALEINFERT	Weighted median	310	0.002545	0.0902977	0.977515	-0.174439	0.179529	1.00255	0.839929	1.19665
	Female infertility || id:finn-b-N14_FEMALEINFERT	Inverse variance weighted	310	-0.0101015	0.0472656	0.830767	-0.102742	0.0825391	0.989949	0.90236	1.08604
	Female infertility || id:finn-b-N14_FEMALEINFERT	Simple mode	310	-0.0488202	0.183632	0.790526	-0.40874	0.311099	0.952352	0.664487	1.36493
	Female infertility || id:finn-b-N14_FEMALEINFERT	Weighted mode	310	-0.00353808	0.0836112	0.966274	-0.167416	0.16034	0.996468	0.845848	1.17391
	Male infertility || id:finn-b-N14_MALEINFERT	MR Egger	310	0.281713	0.217309	0.195818	-0.144212	0.707639	1.3254	0.865704	2.02919
	Male infertility || id:finn-b-N14_MALEINFERT	Weighted median	310	0.424782	0.233595	0.0689949	-0.0330646	0.882628	1.52926	0.967476	2.41724
	Male infertility || id:finn-b-N14_MALEINFERT	Inverse variance weighted	310	0.270228	0.139754	0.0531632	-0.00369054	0.544147	1.31026	0.996316	1.72314
	Male infertility || id:finn-b-N14_MALEINFERT	Simple mode	310	-0.121255	0.481692	0.801419	-1.06537	0.822861	0.885808	0.3446	2.27701
	Male infertility || id:finn-b-N14_MALEINFERT	Weighted mode	310	0.305106	0.231018	0.187578	-0.14769	0.757902	1.35677	0.862699	2.13379
LDL cholesterol	Female infertility || id:finn-b-N14_FEMALEINFERT	MR Egger	148	0.0494172	0.0862874	0.567725	-0.119706	0.218541	1.05066	0.887181	1.24426
	Female infertility || id:finn-b-N14_FEMALEINFERT	Weighted median	148	0.0385533	0.0861565	0.654528	-0.130313	0.20742	1.03931	0.87782	1.2305
	Female infertility || id:finn-b-N14_FEMALEINFERT	Inverse variance weighted	148	-0.0197257	0.0582499	0.734882	-0.133896	0.0944441	0.980468	0.874681	1.09905
	Female infertility || id:finn-b-N14_FEMALEINFERT	Simple mode	148	-0.112594	0.179765	0.532065	-0.464933	0.239746	0.893514	0.628177	1.27093
	Female infertility || id:finn-b-N14_FEMALEINFERT	Weighted mode	148	-0.00300695	0.0842104	0.971564	-0.168059	0.162045	0.996998	0.845304	1.17591
	Male infertility || id:finn-b-N14_MALEINFERT	MR Egger	148	-0.0220485	0.247922	0.929257	-0.507975	0.463878	0.978193	0.601713	1.59023
	Male infertility || id:finn-b-N14_MALEINFERT	Weighted median	148	0.12295	0.277105	0.657263	-0.420176	0.666076	1.13083	0.656931	1.94658
	Male infertility || id:finn-b-N14_MALEINFERT	Inverse variance weighted	148	0.0580097	0.166772	0.727961	-0.268863	0.384882	1.05973	0.764248	1.46944
	Male infertility || id:finn-b-N14_MALEINFERT	Simple mode	148	0.513055	0.504766	0.311099	-0.476287	1.5024	1.67039	0.621085	4.49244
	Male infertility || id:finn-b-N14_MALEINFERT	Weighted mode	148	0.11832	0.233579	0.613227	-0.339495	0.576136	1.1256	0.71213	1.77915
